# Supplementary material for: Highly complete long-read genomes reveal pangenomic variation underlying yeast phenotypic diversity
Source: HighWire-hosted journal article supplement (doi:10.1101/gr.277515.122), 2023-05-01
Supplement: Supplemental_Tables.xlsx [file Supplemental_Tables.xlsx]

## Sheet: Table S1 - Assemblies
		READS						CONTIGS						Genbank accession
Strain name	Strain ID	Read count	Read bases	Mean length	Min length	Max length	N50 length	Num seqs	Total bases	Mean length	Min length	Max length	N50 length
M22	MSY24	1032150	13015042449	12610	45	38770	12865	17	11917743	701044	82736	1486385	921504	SAMN23081757
BY	MSY25	994305	11794701080	11862	43	35229	12165	17	12247132	720420	84808	1557076	931204	SAMN23081758
RM	MSY26	1700734	21740054067	12783	45	46306	13135	17	11874732	698514	80635	1485544	920149	SAMN23081759
YPS163	MSY28	1681503	21065781398	12528	44	40295	13094	17	11977530	704561	77443	1482386	919809	SAMN23081760
YJM145	MSY27	1039334	13322909129	12819	42	34692	13012	17	11983266	704898	86207	1511166	917083	SAMN23081761
CLIB413	MSY29	1271211	16739399883	13168	44	40145	13184	17	12055064	709121	76984	1503078	924249	SAMN23081762
YJM978	MSY30	1297793	16748460053	12905	44	36772	13239	17	11915843	700932	78322	1481717	918678	SAMN23081763
YJM454	MSY31	1037884	13883266583	13377	46	33697	13657	17	12001717	705983	79649	1484482	902664	SAMN23081764
YPS1009	MSY32	58031	708166842	12203	1453	31085	12251	17	11972875	704287	78726	1505921	920046	SAMN23081765
I14	MSY33	65264	793486739	12158	60	34843	12217	17	11887471	699263	80428	1500938	906278	SAMN23081766
Y10	MSY34	33118	390867272	11802	61	32798	11933	17	12210195	718247	85107	1513167	937969	SAMN23081767
PW5	MSY35	22005	241148181	10959	60	20821	11353	17	11783870	693169	73444	1471157	910012	SAMN23081768
273614	MSY36	79408	993364289	12510	61	34685	12548	17	12153742	714926	76596	1518222	928925	SAMN23081769
YJM981	MSY37	74830	910839087	12172	61	31061	12238	17	12294455	723203	78916	1573161	916014	SAMN23081770
CBS2888	MSY38	67643	847000727	12522	61	45256	12496	17	12088992	711117	85595	1466813	928218	SAMN23081771
CLIB219	MSY39	68786	849781610	12354	1188	35515	12403	17	11858308	697548	78321	1470247	914767	SAMN23081772

## Sheet: Table S2 - indels in QTLs
QTL info									Indel info
trait	LOD	qtl ID	qtl.width	qtl.left	qtl.right	cross	allele.effect	genes.near.qtl	query.chrom	chrom	class	length	start.in.target	end.in.target	start.in.query	end.in.query	ID	strain	genes.in.indel
Cadmium_Chloride;75uM;2	516.147	210	9835	790038	799872	MSY35_MSY36	1	SUL1 PCA1 PHO89 TYC1	NA	chrII	D	1281	791870	793151	NA	NA	MSY35_32218	MSY35	PCA1
Lithium_Chloride;100mM;2	302.32	915	10549	528013	538561	MSY37_MSY38	1	ENA5 ENA2 ENA1	tig00000087j113rc	chrIV	I	7771	538358	538358	594481	602251	MSY37_3476	MSY37	ENA1
Lithium_Chloride;100mM;2	302.32	915	10549	528013	538561	MSY37_MSY38	-1	ENA5 ENA2 ENA1	tig00000043rcj42rc	chrIV	D	7756	527291	535046	518078	518078	MSY38_21728	MSY38	ENA5 ENA2
Lithium_Chloride;100mM;2	273.928	916	12143	526687	538829	MSY33_MSY34	-1	KRS1 ENA5 ENA2 ENA1	tig00000001rc	chrIV	D	7759	527296	535054	531096	531096	MSY34_997	MSY34	ENA5 ENA2
Neomycin;5mg/mL;2	222.398	920	437	45700	46136	MSY38_MSY39	1	HO YDL228C SSB1	NA	chrIV	D	1596	46353	47949	NA	NA	MSY38_25932	MSY38	HO
Neomycin;5mg/mL;2	222.398	920	437	45700	46136	MSY38_MSY39	-1	HO YDL228C SSB1	NA	chrIV	D	1674	46353	48027	NA	NA	MSY39_24605	MSY39	HO
Neomycin;5mg/mL;2	158.572	926	1	46064	46064	MSY39_MSY24	-1	HO YDL228C SSB1	NA	chrIV	D	1674	46353	48027	NA	NA	MSY39_24605	MSY39	HO
Neomycin;5mg/mL;2	158.572	926	1	46064	46064	MSY39_MSY24	1	HO YDL228C SSB1	NA	chrIV	D	1596	46353	47949	NA	NA	MSY24_18064	MSY24	HO
Lithium_Chloride;100mM;2	139.11	929	12057	526651	538707	MSY35_MSY36	-1	KRS1 ENA5 ENA2 ENA1	tig00000001rc	chrIV	D	7759	527296	535054	520878	520878	MSY35_1078	MSY35	ENA5 ENA2
Lithium_Chloride;100mM;2	139.11	929	12057	526651	538707	MSY35_MSY36	1	KRS1 ENA5 ENA2 ENA1	tig00000001	chrIV	D	3885	534606	538490	550860	550860	MSY36_1096	MSY36	ENA1
Lithium_Chloride;100mM;2	136.589	930	7415	519681	527095	MSY27_MSY28	-1	tL(UAA)D tQ(UUG)D1 YDR034C-A YDR034C-C YDR034C-D YDR034W-B ARO3 EHD3 KRS1 ENA5	tig00000001	chrIV	D	5964	513680	519643	514052	514052	MSY27_601	MSY27	YDR034C-C YDR034C-D
Lithium_Chloride;100mM;2	136.589	930	7415	519681	527095	MSY27_MSY28	-1	tL(UAA)D tQ(UUG)D1 YDR034C-A YDR034C-C YDR034C-D YDR034W-B ARO3 EHD3 KRS1 ENA5	tig00000001	chrIV	D	334	520470	520803	514866	514866	MSY27_609	MSY27	YDR034C-A
Lithium_Chloride;100mM;2	136.589	930	7415	519681	527095	MSY27_MSY28	-1	tL(UAA)D tQ(UUG)D1 YDR034C-A YDR034C-C YDR034C-D YDR034W-B ARO3 EHD3 KRS1 ENA5	tig00000001	chrIV	D	7759	527296	535054	521438	521438	MSY27_705	MSY27	ENA5 ENA2
Lithium_Chloride;100mM;2	136.589	930	7415	519681	527095	MSY27_MSY28	1	tL(UAA)D tQ(UUG)D1 YDR034C-A YDR034C-C YDR034C-D YDR034W-B ARO3 EHD3 KRS1 ENA5	tig00000001	chrIV	I	253	519644	519644	524071	524323	MSY28_936	MSY28
Caffeine;15mM;2	128.788	931	14466	870227	884692	MSY34_MSY35	-1	tI(UAU)D MSS4 YDR209C YDR210C-C YDR210C-D YDR210W YDR210W-A YDR210W-B GCD6	tig00000001rc	chrIV	D	5963	871815	877777	868152	868152	MSY34_1407	MSY34	YDR210W-A YDR210W-B
Caffeine;15mM;2	128.788	931	14466	870227	884692	MSY34_MSY35	1	tI(UAU)D MSS4 YDR209C YDR210C-C YDR210C-D YDR210W YDR210W-A YDR210W-B GCD6	tig00000001rc	chrIV	D	5349	872097	877445	850848	850848	MSY35_1568	MSY35	YDR210W-A YDR210W-B
Lithium_Chloride;100mM;2	120.129	932	15679	522691	538369	MSY39_MSY24	-1	ARO3 EHD3 KRS1 ENA5 ENA2 ENA1	tig00000001	chrIV	D	7759	527296	535054	521898	521898	MSY39_907	MSY39	ENA5 ENA2
Lithium_Chloride;100mM;2	120.129	932	15679	522691	538369	MSY39_MSY24	1	ARO3 EHD3 KRS1 ENA5 ENA2 ENA1	tig00000001rc	chrIV	D	3885	534364	538248	533216	533216	MSY24_492	MSY24	ENA2 ENA1
Neomycin;5mg/mL;2	108.539	935	2692	45702	48393	MSY37_MSY38	-1	HO YDL228C SSB1	NA	chrIV	D	1751	46276	48027	NA	NA	MSY37_19015	MSY37	HO
Neomycin;5mg/mL;2	108.539	935	2692	45702	48393	MSY37_MSY38	1	HO YDL228C SSB1	NA	chrIV	D	1596	46353	47949	NA	NA	MSY38_25932	MSY38	HO
Neomycin;5mg/mL;2	90.6766	944	849	45216	46064	MSY28_MSY29	-1	HO YDL228C SSB1	NA	chrIV	D	1761	46270	48031	NA	NA	MSY28_20390	MSY28	HO
Neomycin;5mg/mL;2	90.6766	944	849	45216	46064	MSY28_MSY29	1	HO YDL228C SSB1	NA	chrIV	D	1596	46353	47949	NA	NA	MSY29_18711	MSY29	HO
Neomycin;5mg/mL;2	80.4764	948	31160	511400	542559	MSY32_MSY33	-1	SNR47 tL(UAA)D tQ(UUG)D1 LYS14 YDR034C-A YDR034C-C YDR034C-D YDR034W-B ARO3 EHD3 KRS1 ENA5 ENA2 ENA1 RSM10 YDR042C NRG1	tig00000001rc	chrIV	D	7759	527296	535054	543246	543246	MSY32_1027	MSY32	ENA5 ENA2
Neomycin;5mg/mL;2	80.4764	948	31160	511400	542559	MSY32_MSY33	-1	SNR47 tL(UAA)D tQ(UUG)D1 LYS14 YDR034C-A YDR034C-C YDR034C-D YDR034W-B ARO3 EHD3 KRS1 ENA5 ENA2 ENA1 RSM10 YDR042C NRG1	NA	chrIV	D	6466	513258	519724	NA	NA	MSY32_25802	MSY32	YDR034C-C YDR034C-D
Neomycin;5mg/mL;2	80.4764	948	31160	511400	542559	MSY32_MSY33	1	SNR47 tL(UAA)D tQ(UUG)D1 LYS14 YDR034C-A YDR034C-C YDR034C-D YDR034W-B ARO3 EHD3 KRS1 ENA5 ENA2 ENA1 RSM10 YDR042C NRG1	tig00000001rc	chrIV	D	5964	513680	519643	528490	528490	MSY33_595	MSY33	YDR034C-C YDR034C-D
Cadmium_Chloride;75uM;2	87.745	1656	4727	390232	394958	MSY32_MSY33	1	ICR1 FLO11 YIR020C YIR020W-A	tig00000027	chrIX	I	495	390770	390770	375640	376134	MSY33_14487	MSY33	FLO11
Maltose;;1	368.18	2795	971	1067872	1068842	MSY30_MSY31	1	IMA1	NA	chrVII	D	5813	1069014	1074827	NA	NA	MSY31_20607	MSY31	MAL13 MAL11
Maltose;;1	290.041	2796	763	1067981	1068743	MSY32_MSY33	-1	IMA1	NA	chrVII	D	5800	1069024	1074824	NA	NA	MSY32_25812	MSY32	MAL13 MAL11
Maltose;;1	278.101	2798	893	1067851	1068743	MSY31_MSY32	1	IMA1	NA	chrVII	D	5813	1069014	1074827	NA	NA	MSY31_20607	MSY31	MAL13 MAL11
Maltose;;1	278.101	2798	893	1067851	1068743	MSY31_MSY32	-1	IMA1	NA	chrVII	D	5800	1069024	1074824	NA	NA	MSY32_25812	MSY32	MAL13 MAL11
Maltose;;1	244.429	2799	524	1068283	1068806	MSY37_MSY38	1	IMA1	NA	chrVII	D	7281	1068847	1076128	NA	NA	MSY37_19023	MSY37	IMA1 MAL13 MAL11 YGR290W
Maltose;;1	244.429	2799	524	1068283	1068806	MSY37_MSY38	-1	IMA1	NA	chrVII	D	5810	1069014	1074824	NA	NA	MSY38_25946	MSY38	MAL13 MAL11
Maltose;;1	143.586	2808	600	1068132	1068731	MSY33_MSY34	-1	IMA1	NA	chrVII	D	7281	1068847	1076128	NA	NA	MSY34_22939	MSY34	IMA1 MAL13 MAL11 YGR290W
Maltose;;1	109.028	2814	814	1067867	1068680	MSY28_MSY29	1	IMA1	NA	chrVII	D	5813	1069014	1074827	NA	NA	MSY28_20398	MSY28	MAL13 MAL11
Maltose;;1	109.028	2814	814	1067867	1068680	MSY28_MSY29	-1	IMA1	NA	chrVII	D	5810	1069014	1074824	NA	NA	MSY29_18720	MSY29	MAL13 MAL11
Cadmium_Chloride;75uM;2	77.5771	2819	21549	532330	553878	MSY29_MSY30	1	SNR46 tD(GUC)G2 tE(UUC)G3 THG1 YGR025W YGR026W RPS25A YGR027W-A YGR027W-B MSP1 ERV1 POP6 NAG1 IMO32 GSC2 TIM21	tig00000011rc	chrVII	D	336	535208	535543	532330	532330	MSY29_3614	MSY29
Cadmium_Chloride;75uM;2	77.5771	2819	21549	532330	553878	MSY29_MSY30	-1	SNR46 tD(GUC)G2 tE(UUC)G3 THG1 YGR025W YGR026W RPS25A YGR027W-A YGR027W-B MSP1 ERV1 POP6 NAG1 IMO32 GSC2 TIM21	tig00000002	chrVII	D	337	535205	535541	551368	551368	MSY30_3111	MSY30
Copper_Sulfate;;1	392.874	3478	7589	210815	218403	MSY35_MSY36	-1	RUF5-1 RUF5-2 CIC1 YHR052W-A CUP1-1 YHR054C YHR054W-A CUP1-2 RSC30 YHR056W-A CPR2	tig00000013rc	chrVIII	D	2002	212729	214730	202974	202974	MSY35_17304	MSY35	RUF5-1 RUF5-2 YHR054C YHR054W-A CUP1-2
Copper_Sulfate;;1	392.874	3478	7589	210815	218403	MSY35_MSY36	1	RUF5-1 RUF5-2 CIC1 YHR052W-A CUP1-1 YHR054C YHR054W-A CUP1-2 RSC30 YHR056W-A CPR2	tig00000018	chrVIII	I	4644	215172	215172	222910	227553	MSY36_10875	MSY36
Copper_Sulfate;;1	392.874	3478	7589	210815	218403	MSY35_MSY36	1	RUF5-1 RUF5-2 CIC1 YHR052W-A CUP1-1 YHR054C YHR054W-A CUP1-2 RSC30 YHR056W-A CPR2	NA	chrVIII	D	1067	213195	214262	NA	NA	MSY36_18106	MSY36	YHR054C
Copper_Sulfate;;1	296.519	3481	7431	210748	218178	MSY33_MSY34	1	RUF5-1 RUF5-2 CIC1 YHR052W-A CUP1-1 YHR054C YHR054W-A CUP1-2 RSC30 YHR056W-A CPR2	tig00000022rc	chrVIII	I	2538	213874	213874	202315	204852	MSY33_11075	MSY33	YHR054C
Copper_Sulfate;;1	296.519	3481	7431	210748	218178	MSY33_MSY34	1	RUF5-1 RUF5-2 CIC1 YHR052W-A CUP1-1 YHR054C YHR054W-A CUP1-2 RSC30 YHR056W-A CPR2	tig00000022rc	chrVIII	I	683	213936	213936	204933	205615	MSY33_11095	MSY33	YHR054C
Copper_Sulfate;;1	296.519	3481	7431	210748	218178	MSY33_MSY34	1	RUF5-1 RUF5-2 CIC1 YHR052W-A CUP1-1 YHR054C YHR054W-A CUP1-2 RSC30 YHR056W-A CPR2	tig00000022rc	chrVIII	I	738	213988	213988	205924	206661	MSY33_11111	MSY33	YHR054C
Copper_Sulfate;;1	296.519	3481	7431	210748	218178	MSY33_MSY34	1	RUF5-1 RUF5-2 CIC1 YHR052W-A CUP1-1 YHR054C YHR054W-A CUP1-2 RSC30 YHR056W-A CPR2	tig00000022rc	chrVIII	I	1549	214020	214020	206704	208252	MSY33_11125	MSY33	YHR054C
Copper_Sulfate;;1	296.519	3481	7431	210748	218178	MSY33_MSY34	1	RUF5-1 RUF5-2 CIC1 YHR052W-A CUP1-1 YHR054C YHR054W-A CUP1-2 RSC30 YHR056W-A CPR2	tig00000022rc	chrVIII	I	977	214082	214082	208323	209299	MSY33_11147	MSY33	YHR054C
Copper_Sulfate;;1	296.519	3481	7431	210748	218178	MSY33_MSY34	1	RUF5-1 RUF5-2 CIC1 YHR052W-A CUP1-1 YHR054C YHR054W-A CUP1-2 RSC30 YHR056W-A CPR2	tig00000022rc	chrVIII	I	1470	214124	214124	209356	210825	MSY33_11157	MSY33	YHR054C
Copper_Sulfate;;1	296.519	3481	7431	210748	218178	MSY33_MSY34	1	RUF5-1 RUF5-2 CIC1 YHR052W-A CUP1-1 YHR054C YHR054W-A CUP1-2 RSC30 YHR056W-A CPR2	tig00000022rc	chrVIII	I	662	214200	214200	210915	211576	MSY33_11183	MSY33	YHR054C
Copper_Sulfate;;1	296.519	3481	7431	210748	218178	MSY33_MSY34	-1	RUF5-1 RUF5-2 CIC1 YHR052W-A CUP1-1 YHR054C YHR054W-A CUP1-2 RSC30 YHR056W-A CPR2	tig00000013	chrVIII	D	2002	212729	214730	206134	206134	MSY34_15924	MSY34	RUF5-1 RUF5-2 YHR054C YHR054W-A CUP1-2
Copper_Sulfate;;1	272.559	3482	7624	210587	218210	MSY39_MSY24	-1	RUF5-1 RUF5-2 COX6 CIC1 YHR052W-A CUP1-1 YHR054C YHR054W-A CUP1-2 RSC30 YHR056W-A CPR2	tig00000018	chrVIII	D	1996	212265	214260	201148	201148	MSY39_15355	MSY39	RUF5-1 YHR052W-A CUP1-1 YHR054C
Copper_Sulfate;;1	272.559	3482	7624	210587	218210	MSY39_MSY24	1	RUF5-1 RUF5-2 COX6 CIC1 YHR052W-A CUP1-1 YHR054C YHR054W-A CUP1-2 RSC30 YHR056W-A CPR2	tig00000006	chrVIII	I	742	213262	213262	554001	554742	MSY24_5298	MSY24	YHR054C
Copper_Sulfate;;1	272.559	3482	7624	210587	218210	MSY39_MSY24	1	RUF5-1 RUF5-2 COX6 CIC1 YHR052W-A CUP1-1 YHR054C YHR054W-A CUP1-2 RSC30 YHR056W-A CPR2	tig00000006	chrVIII	I	387	213522	213522	555198	555584	MSY24_5394	MSY24	YHR054C
Copper_Sulfate;;1	272.559	3482	7624	210587	218210	MSY39_MSY24	1	RUF5-1 RUF5-2 COX6 CIC1 YHR052W-A CUP1-1 YHR054C YHR054W-A CUP1-2 RSC30 YHR056W-A CPR2	tig00000006	chrVIII	I	1093	213592	213592	555667	556759	MSY24_5412	MSY24	YHR054C
Copper_Sulfate;;1	272.559	3482	7624	210587	218210	MSY39_MSY24	1	RUF5-1 RUF5-2 COX6 CIC1 YHR052W-A CUP1-1 YHR054C YHR054W-A CUP1-2 RSC30 YHR056W-A CPR2	tig00000006	chrVIII	I	319	213634	213634	556814	557132	MSY24_5426	MSY24	YHR054C
Copper_Sulfate;;1	272.559	3482	7624	210587	218210	MSY39_MSY24	1	RUF5-1 RUF5-2 COX6 CIC1 YHR052W-A CUP1-1 YHR054C YHR054W-A CUP1-2 RSC30 YHR056W-A CPR2	tig00000006	chrVIII	I	254	213654	213654	557153	557406	MSY24_5428	MSY24	YHR054C
Copper_Sulfate;;1	272.559	3482	7624	210587	218210	MSY39_MSY24	1	RUF5-1 RUF5-2 COX6 CIC1 YHR052W-A CUP1-1 YHR054C YHR054W-A CUP1-2 RSC30 YHR056W-A CPR2	tig00000006	chrVIII	I	1583	213738	213738	557520	559102	MSY24_5464	MSY24	YHR054C
Copper_Sulfate;;1	272.559	3482	7624	210587	218210	MSY39_MSY24	1	RUF5-1 RUF5-2 COX6 CIC1 YHR052W-A CUP1-1 YHR054C YHR054W-A CUP1-2 RSC30 YHR056W-A CPR2	tig00000006	chrVIII	I	1614	213828	213828	559270	560883	MSY24_5482	MSY24	YHR054C
Copper_Sulfate;;1	272.559	3482	7624	210587	218210	MSY39_MSY24	1	RUF5-1 RUF5-2 COX6 CIC1 YHR052W-A CUP1-1 YHR054C YHR054W-A CUP1-2 RSC30 YHR056W-A CPR2	tig00000006	chrVIII	I	1005	213846	213846	560905	561909	MSY24_5486	MSY24	YHR054C
Copper_Sulfate;;1	272.559	3482	7624	210587	218210	MSY39_MSY24	1	RUF5-1 RUF5-2 COX6 CIC1 YHR052W-A CUP1-1 YHR054C YHR054W-A CUP1-2 RSC30 YHR056W-A CPR2	tig00000006	chrVIII	I	1313	213882	213882	561951	563263	MSY24_5494	MSY24	YHR054C
Copper_Sulfate;;1	272.559	3482	7624	210587	218210	MSY39_MSY24	1	RUF5-1 RUF5-2 COX6 CIC1 YHR052W-A CUP1-1 YHR054C YHR054W-A CUP1-2 RSC30 YHR056W-A CPR2	tig00000006	chrVIII	I	539	213942	213942	563341	563879	MSY24_5512	MSY24	YHR054C
Copper_Sulfate;;1	272.559	3482	7624	210587	218210	MSY39_MSY24	1	RUF5-1 RUF5-2 COX6 CIC1 YHR052W-A CUP1-1 YHR054C YHR054W-A CUP1-2 RSC30 YHR056W-A CPR2	tig00000006	chrVIII	I	494	214026	214026	564149	564642	MSY24_5536	MSY24	YHR054C
Copper_Sulfate;;1	272.559	3482	7624	210587	218210	MSY39_MSY24	1	RUF5-1 RUF5-2 COX6 CIC1 YHR052W-A CUP1-1 YHR054C YHR054W-A CUP1-2 RSC30 YHR056W-A CPR2	tig00000006	chrVIII	I	1419	214106	214106	564849	566267	MSY24_5562	MSY24	YHR054C
Copper_Sulfate;;1	272.559	3482	7624	210587	218210	MSY39_MSY24	1	RUF5-1 RUF5-2 COX6 CIC1 YHR052W-A CUP1-1 YHR054C YHR054W-A CUP1-2 RSC30 YHR056W-A CPR2	tig00000006	chrVIII	I	1447	214162	214162	566343	567789	MSY24_5578	MSY24	YHR054C
Copper_Sulfate;;1	272.559	3482	7624	210587	218210	MSY39_MSY24	1	RUF5-1 RUF5-2 COX6 CIC1 YHR052W-A CUP1-1 YHR054C YHR054W-A CUP1-2 RSC30 YHR056W-A CPR2	tig00000006	chrVIII	I	1384	214194	214194	567828	569211	MSY24_5590	MSY24	YHR054C
Copper_Sulfate;;1	272.559	3482	7624	210587	218210	MSY39_MSY24	1	RUF5-1 RUF5-2 COX6 CIC1 YHR052W-A CUP1-1 YHR054C YHR054W-A CUP1-2 RSC30 YHR056W-A CPR2	tig00000006	chrVIII	I	19640	214730	214730	569778	589417	MSY24_5606	MSY24	RUF5-2
Copper_Sulfate;;1	242.847	3483	8966	209176	218141	MSY26_MSY27	1	RUF5-1 RUF5-2 SMF2 YHR050W-A COX6 CIC1 YHR052W-A CUP1-1 YHR054C YHR054W-A CUP1-2 RSC30 YHR056W-A CPR2	tig00000023	chrVIII	I	741	213262	213262	207878	208618	MSY26_8010	MSY26	YHR054C
Copper_Sulfate;;1	242.847	3483	8966	209176	218141	MSY26_MSY27	1	RUF5-1 RUF5-2 SMF2 YHR050W-A COX6 CIC1 YHR052W-A CUP1-1 YHR054C YHR054W-A CUP1-2 RSC30 YHR056W-A CPR2	tig00000023	chrVIII	I	387	213522	213522	209074	209460	MSY26_8106	MSY26	YHR054C
Copper_Sulfate;;1	242.847	3483	8966	209176	218141	MSY26_MSY27	1	RUF5-1 RUF5-2 SMF2 YHR050W-A COX6 CIC1 YHR052W-A CUP1-1 YHR054C YHR054W-A CUP1-2 RSC30 YHR056W-A CPR2	tig00000023	chrVIII	I	1092	213592	213592	209543	210634	MSY26_8124	MSY26	YHR054C
Copper_Sulfate;;1	242.847	3483	8966	209176	218141	MSY26_MSY27	1	RUF5-1 RUF5-2 SMF2 YHR050W-A COX6 CIC1 YHR052W-A CUP1-1 YHR054C YHR054W-A CUP1-2 RSC30 YHR056W-A CPR2	tig00000023	chrVIII	I	319	213634	213634	210689	211007	MSY26_8138	MSY26	YHR054C
Copper_Sulfate;;1	242.847	3483	8966	209176	218141	MSY26_MSY27	1	RUF5-1 RUF5-2 SMF2 YHR050W-A COX6 CIC1 YHR052W-A CUP1-1 YHR054C YHR054W-A CUP1-2 RSC30 YHR056W-A CPR2	tig00000023	chrVIII	I	254	213654	213654	211028	211281	MSY26_8140	MSY26	YHR054C
Copper_Sulfate;;1	242.847	3483	8966	209176	218141	MSY26_MSY27	1	RUF5-1 RUF5-2 SMF2 YHR050W-A COX6 CIC1 YHR052W-A CUP1-1 YHR054C YHR054W-A CUP1-2 RSC30 YHR056W-A CPR2	tig00000023	chrVIII	I	426	213686	213686	211320	211745	MSY26_8152	MSY26	YHR054C
Copper_Sulfate;;1	242.847	3483	8966	209176	218141	MSY26_MSY27	1	RUF5-1 RUF5-2 SMF2 YHR050W-A COX6 CIC1 YHR052W-A CUP1-1 YHR054C YHR054W-A CUP1-2 RSC30 YHR056W-A CPR2	tig00000023	chrVIII	I	1179	213744	213744	211807	212985	MSY26_8170	MSY26	YHR054C
Copper_Sulfate;;1	242.847	3483	8966	209176	218141	MSY26_MSY27	1	RUF5-1 RUF5-2 SMF2 YHR050W-A COX6 CIC1 YHR052W-A CUP1-1 YHR054C YHR054W-A CUP1-2 RSC30 YHR056W-A CPR2	tig00000023	chrVIII	I	986	213844	213844	213157	214142	MSY26_8190	MSY26	YHR054C
Copper_Sulfate;;1	242.847	3483	8966	209176	218141	MSY26_MSY27	1	RUF5-1 RUF5-2 SMF2 YHR050W-A COX6 CIC1 YHR052W-A CUP1-1 YHR054C YHR054W-A CUP1-2 RSC30 YHR056W-A CPR2	tig00000023	chrVIII	I	1312	213882	213882	214187	215498	MSY26_8198	MSY26	YHR054C
Copper_Sulfate;;1	242.847	3483	8966	209176	218141	MSY26_MSY27	1	RUF5-1 RUF5-2 SMF2 YHR050W-A COX6 CIC1 YHR052W-A CUP1-1 YHR054C YHR054W-A CUP1-2 RSC30 YHR056W-A CPR2	tig00000023	chrVIII	I	539	213942	213942	215576	216114	MSY26_8216	MSY26	YHR054C
Copper_Sulfate;;1	242.847	3483	8966	209176	218141	MSY26_MSY27	1	RUF5-1 RUF5-2 SMF2 YHR050W-A COX6 CIC1 YHR052W-A CUP1-1 YHR054C YHR054W-A CUP1-2 RSC30 YHR056W-A CPR2	tig00000023	chrVIII	I	493	214026	214026	216384	216876	MSY26_8240	MSY26	YHR054C
Copper_Sulfate;;1	242.847	3483	8966	209176	218141	MSY26_MSY27	1	RUF5-1 RUF5-2 SMF2 YHR050W-A COX6 CIC1 YHR052W-A CUP1-1 YHR054C YHR054W-A CUP1-2 RSC30 YHR056W-A CPR2	tig00000023	chrVIII	I	642	214084	214084	216944	217585	MSY26_8258	MSY26	YHR054C
Copper_Sulfate;;1	242.847	3483	8966	209176	218141	MSY26_MSY27	1	RUF5-1 RUF5-2 SMF2 YHR050W-A COX6 CIC1 YHR052W-A CUP1-1 YHR054C YHR054W-A CUP1-2 RSC30 YHR056W-A CPR2	tig00000023	chrVIII	I	675	214142	214142	217694	218368	MSY26_8276	MSY26	YHR054C
Copper_Sulfate;;1	242.847	3483	8966	209176	218141	MSY26_MSY27	1	RUF5-1 RUF5-2 SMF2 YHR050W-A COX6 CIC1 YHR052W-A CUP1-1 YHR054C YHR054W-A CUP1-2 RSC30 YHR056W-A CPR2	tig00000023	chrVIII	I	1384	214194	214194	218424	219807	MSY26_8290	MSY26	YHR054C
Copper_Sulfate;;1	242.847	3483	8966	209176	218141	MSY26_MSY27	-1	RUF5-1 RUF5-2 SMF2 YHR050W-A COX6 CIC1 YHR052W-A CUP1-1 YHR054C YHR054W-A CUP1-2 RSC30 YHR056W-A CPR2	tig00000019	chrVIII	D	2002	212729	214730	210338	210338	MSY27_15618	MSY27	RUF5-1 RUF5-2 YHR054C YHR054W-A CUP1-2
Zeocin;25ug/mL;3	81.639	3882	30440	422419	452858	MSY36_MSY37	-1	SUP51 EMT3 PRE3 OST1 COX16 SYS1 CYR1 CTK2 YJL007C AVT1 MPP10 MRX12 SAG1 LSO1 APL1 POL31 SUI2 MHO1	tig00000014	chrX	I	5964	424610	424610	440543	446506	MSY37_951	MSY37
Magnesium_Chloride;;1	81.4321	3883	26296	420791	447086	MSY37_MSY38	1	SUP51 EMT3 PRE3 OST1 COX16 SYS1 CYR1 CTK2 YJL007C CCT8 AVT1 MPP10 MRX12 SAG1 APL1	tig00000014	chrX	I	5964	424610	424610	440543	446506	MSY37_951	MSY37
Manganese_Sulfate;;1	78.2117	3884	31944	421583	453526	MSY36_MSY37	-1	SUP51 EMT3 PRE3 OST1 COX16 SYS1 CYR1 CTK2 YJL007C CCT8 AVT1 MPP10 MRX12 SAG1 LSO1 APL1 POL31 SUI2 MHO1 TDH2	tig00000014	chrX	I	5964	424610	424610	440543	446506	MSY37_951	MSY37
Glycerol;;1	76.3575	3885	32215	420791	453005	MSY37_MSY38	1	SUP51 EMT3 PRE3 OST1 COX16 SYS1 CYR1 CTK2 YJL007C CCT8 AVT1 MPP10 MRX12 SAG1 LSO1 APL1 POL31 SUI2 MHO1	tig00000014	chrX	I	5964	424610	424610	440543	446506	MSY37_951	MSY37
Galactose;;1	87.3883	4290	4636	199373	204008	MSY37_MSY38	-1	tK(CUU)K PGM1 PMU1 MYO3	tig00000129rc	chrXI	D	345	202638	202982	203232	203232	MSY37_10832	MSY37
Galactose;;1	87.3883	4290	4636	199373	204008	MSY37_MSY38	1	tK(CUU)K PGM1 PMU1 MYO3	NA	chrXI	D	1777	201779	203556	NA	NA	MSY38_25961	MSY38	tK(CUU)K PGM1
Galactose;;1	75.7628	4292	8139	197501	205639	MSY38_MSY39	1	tK(CUU)K YPK1 PGM1 PMU1 MYO3	NA	chrXI	D	1777	201779	203556	NA	NA	MSY38_25961	MSY38	tK(CUU)K PGM1
Galactose;;1	75.7628	4292	8139	197501	205639	MSY38_MSY39	-1	tK(CUU)K YPK1 PGM1 PMU1 MYO3	tig00000017rc	chrXI	D	345	202638	202982	205158	205158	MSY39_14094	MSY39
Cobalt_Chloride;2mM;2	128.928	4690	7766	649837	657602	MSY25_MSY26	1	tA(AGC)L HAP1 YLR256W-A	tig00000070rcj61	chrXII	D	5925	650818	656742	627964	627964	MSY26_14437	MSY26	HAP1 YLR256W-A
Fluconazole;100uM;2	96.3099	4694	8075	648953	657027	MSY24_MSY25	1	tA(AGC)L HAP1 YLR256W-A	tig00000014j13	chrXII	D	5925	650818	656742	630920	630920	MSY24_11757	MSY24	HAP1 YLR256W-A
Tunicamycin;3uM;3	90.5339	4696	8348	810052	818399	MSY32_MSY33	1	TRR4 FKS1 YLR342W-A GAS2	tig00000026rcj21	chrXII	I	6301	818468	818468	772935	779235	MSY33_12471	MSY33
Tunicamycin;3uM;3	90.5339	4696	8348	810052	818399	MSY32_MSY33	1	TRR4 FKS1 YLR342W-A GAS2	tig00000026rcj21	chrXII	I	337	818488	818488	779256	779592	MSY33_12473	MSY33
Fluconazole;100uM;2	85.7301	4697	8340	650260	658599	MSY25_MSY26	1	tA(AGC)L HAP1 YLR256W-A YLR257W	tig00000070rcj61	chrXII	D	5925	650818	656742	627964	627964	MSY26_14437	MSY26	HAP1 YLR256W-A
Zeocin;25ug/mL;3	76.8241	4699	8954	648649	657602	MSY25_MSY26	1	tA(AGC)L HAP1 YLR256W-A	tig00000070rcj61	chrXII	D	5925	650818	656742	627964	627964	MSY26_14437	MSY26	HAP1 YLR256W-A
Cobalt_Chloride;2mM;2	367.702	7683	2114	209367	211480	MSY38_MSY39	1	tE(UUC)P PPQ1	tig00000011	chrXVI	I	376	210902	210902	207357	207732	MSY38_5576	MSY38

## Sheet: Table S3 - Strains
Name	Strain Name	Background	Mating Type	Genotype (chromosomal)	Plasmid(s)	Other Name(s)	Progenitor(s)	Source	Original Citation (PMID)	Reference/Notes
MSY24	M22	M22	alpha	ho∆::HygMX		YST331		Kruglyak	31647408
MSY25	BY	BY	a	(WT S288C)		YLK1879	BY4716 x BY4700 spore	Kruglyak	31647408
MSY26	RM	RM	alpha	AMN1-BY ho∆::HygMX flo8∆::NatMX		YLK1950		Kruglyak	31647408
MSY27	YPS163	YPS163	a	ho∆::HygMX flo8∆::NatMX		YLK2438		Kruglyak	31647408
MSY28	YJM145	YJM145	alpha	ho∆::HygMX flo8∆::NatMX		YLK2436		Kruglyak	31647408
MSY29	CLIB413	CLIB413	a	ho∆::KanMX				Kruglyak	31647408
MSY30	YJM978	YJM978	alpha	ho∆::HygMX		YST317		Kruglyak	31647408
MSY31	YJM454	YJM454	a	ho∆::KanMX				Kruglyak	31647408
MSY32	YPS1009	YPS1009	alpha	ho∆::HygMX	MSp32	YLK2970		Kruglyak	31647408	NatMX resistance on a plasmid, see plasmid column, but when patched on NAT plates I didn't see any colonies, so it's possible the plasmid was lost during transfer from the Kruglyak lab to here
MSY33	I14	I14	a	ho∆::KanMX				Kruglyak	31647408
MSY34	Y10	Y10	alpha	ho∆::HygMX		YLK2954		Kruglyak	31647408
MSY35	PW5	PW5	alpha	ho∆::HygMX		YLK3019		Kruglyak	31647408
MSY36	273614	273614	a	ho∆::KanMX		YLK2917		Kruglyak	31647408
MSY37	YJM981	YJM981	alpha	ho∆::HygMX	MSp32	YLK2975		Kruglyak	31647408	NatMX resistance on a plasmid, see plasmid column
MSY38	CBS2888	CBS2888	a	ho∆::KanMX				Kruglyak	31647408
MSY39	CLIB219	CLIB219	alpha	ho∆::HygMX	MSp32	YLK2979		Kruglyak	31647408	NatMX resistance on a plasmid, see plasmid column
MSY168	sge1Δ from MATa KO collection	BY	a	MATa his3Δ leu2Δ met15Δ ura3Δ sge1Δ::KanMX			BY4741		12140549

## Sheet: Table S4 - Plasmids
Name	Plasmid contents/name	Selection (bact)	Selection (euk)	Copy # (euk)	Source	Progenitor	Insert	Sequence	Citation (PMID)
MSp8	pRS415	amp	LEU2	cen-ars	Philip Hieter (by way of Kruglyak)			https://benchling.com/s/seq-ipYyZ23ncHskS3nxAHGM https://www.addgene.org/vector-database/3984/	2659436
MSp32	Ste2promoter-Citrine/Ste3promoter-mCherry	Amp	NatMX	cen-ars	Kruglyak Lab			https://www.addgene.org/58563/	25569670
MSp183	pRS418 (cen NatMX)	amp	NatMX	cen-ars	Fred Cross (by way of addgene)			https://www.addgene.org/11256/
MSp189	SGE1-MSY25	amp	LEU2	cen-ars	this study	MSp8 digested with EafI-HF and HindIII-HF	SGE1_BY amplified with oMS100/101	https://benchling.com/s/seq-2FGPDPT3MKFvyarYL6ba
MSp190	SGE1-MSY32	amp	LEU2	cen-ars	this study	MSp8 digested with EafI-HF and HindIII-HF	SGE1_YPS1009 amplified with oMS100/101	https://benchling.com/s/seq-r4UtXfCfF4ldfRN9u3A7
MSp191	SGE1-MSY33	amp	LEU2	cen-ars	this study	MSp8 digested with EafI-HF and HindIII-HF	SGE1_I14 amplified with oMS100/101	https://benchling.com/s/seq-SVlVz1Me2oCwoNrG8xy6
MSp192	SGE1-MSY28	amp	LEU2	cen-ars	this study	MSp8 digested with EafI-HF and HindIII-HF	SGE1_YJM145 amplified with oMS100/101	https://benchling.com/s/seq-OnCaN7TP0fhZWIjwxnDT
MSp198	MAL63-MSY28	amp	NatMX	cen-ars	this study	MSp183 digested with ApaI and EagI-HF	MALR_YJM145 amplified with oMS90/111	https://benchling.com/s/seq-JhyFAhO4Q6bMscWYPEXy
MSp200	SGE1-L449M	amp	LEU2	cen-ars	this study	MSp191 amplified with oMS128/129	oMS127	https://benchling.com/s/seq-2jeCBprBPSDzgenLWtAX

## Sheet: Table S5 - Oligonucleotides
Name	Description	Sequence	Length	Experiment	Comments
oMS90	MAL63 cloning R	ctatagggcgaattgggtaccggcc TAGCCAGTAGGTAGATACGG	45	MALR cloning	Amplified from MSY28 gDNA with primer oMS111. 692 bp downstream of Stop
oMS91	MAL63 - seq1	agggttttcccagtcacgac	20	MALR cloning
oMS92	MAL63 - seq2	cacaggaaacagctatgacc	20	MALR cloning
oMS93	MAL63 - seq3	TTCTCGTATCCGCAAACTGC	20	MALR cloning
oMS94	MAL63 - seq4	GAGTATGAGGAAGGAGTCAC	20	MALR cloning
oMS95	MAL63 - seq5	AGCCATGGTCTTACGGATAC	20	MALR cloning
oMS100	SGE1 cloning F	cgaggtcgacggtatcgataCTGCGAATTGTTCAAACCCG	40	SGE1 cloning	467 bp upstream. Amplify with oMS101 to clone into EagI/HindIII-cut pRS415
oMS101	SGE1 cloning R	tggagctccaccgcggtggcCTTGCTCAACTGAAAGTCCAC	41	SGE1 cloning	357 bp downstream
oMS102	SGE1 seq 1	tcactatagggcgaattggg	20	SGE1 cloning
oMS103	SGE1 seq 2	gctatgaccatgattacgcc	20	SGE1 cloning
oMS104	SGE1 seq 3	GATGTGGTTCTCCAGATGTG	20	SGE1 cloning
oMS105	SGE1 seq 4	TGGAACATCCATTGTCCGAG	20	SGE1 cloning
oMS106	SGE1 seq 5	GACAACAAGCGGATCAAACC	20	SGE1 cloning
oMS111	MAL63 cloning F	tggagctccaccgcggtggc GACCCTATCTTTACGTAAGG	40	MALR cloning	827 bp upstream of Start. Clone into ApaI/EagI-cut pRS418
oMS124	SGE1 seq 6	CATAAGCAAAGCAAGAAAGGAATCC	25	SGE1 cloning
oMS125	MAL63 seq6	ATCGTAGGAAAGCATTGGCC	20	MALR cloning
oMS126	MAL63 seq7	GTCTCTAGCAATTTCGACTGG	21	MALR cloning
oMS127	SGE1-L449M Insert	CAGCTTTCAACTCGTTCGCCAAATCCaTGGGCTTTGCGTTTGGAGGG	47	SGE1 cloning	Used as ssDNA insert in Gibson assembly
oMS128	SGE1-L449M HercF	TGGGCTTTGCGTTTGGAGGGAATATGGG	28	SGE1 cloning	Amplified from MSp191 with oMS129 for Gibson assembly with oMS127
oMS129	SGE1-L449M HercR	GGCGAACGAGTTGAAAGCTGTGACTTCAATAAACTTG	37	SGE1 cloning
